# Supplementary material for: Knocking down NSUN5 inhibits the development of clear cell renal cell carcinoma by inhibiting the p53 pathway
Source: publisher site journal article supplement (doi:10.18632/aging.204761), 2023-06-01
Supplement: Supplementary file [file aging-v15i11-204761-supplementary-material-SD1.pdf]

## SUPPLEMENTARY TABLES

**Supplementary Table 1. Immune checkpoint gene set.**

| <b>Symbol</b> | <b>Description</b>                                                                     |
|---------------|----------------------------------------------------------------------------------------|
| IDO1          | Indoleamine 2,3-Dioxygenase 1                                                          |
| LAG3          | Lymphocyte Activating 3                                                                |
| CTLA4         | Cytotoxic T-Lymphocyte Associated Protein 4                                            |
| TNFRSF9       | TNF Receptor Superfamily Member 9                                                      |
| ICOS          | Inducible T Cell Costimulator                                                          |
| CD80          | CD80 Molecule                                                                          |
| PDCD1LG2      | Programmed Cell Death 1 Ligand 2                                                       |
| TIGIT         | T Cell Immunoreceptor with Ig and ITIM Domains                                         |
| CD70          | CD70 Molecule                                                                          |
| TNFSF9        | TNF Superfamily Member 9                                                               |
| ICOSLG        | Inducible T Cell Costimulator Ligand                                                   |
| KIR3DL1       | Killer Cell Immunoglobulin Like Receptor, Three Ig Domains and Long Cytoplasmic Tail 1 |
| CD86          | CD86 Molecule                                                                          |
| PDCD1         | Programmed Cell Death 1                                                                |
| LAIR1         | Leukocyte Associated Immunoglobulin Like Receptor 1                                    |
| TNFRSF8       | TNF Receptor Superfamily Member 8                                                      |
| TNFSF15       | TNF Superfamily Member 15                                                              |
| TNFRSF14      | TNF Receptor Superfamily Member 14                                                     |
| IDO2          | Indoleamine 2,3-Dioxygenase 2                                                          |
| CD276         | CD276 Molecule                                                                         |
| CD40          | CD40 Molecule                                                                          |
| TNFRSF4       | TNF Receptor Superfamily Member 4                                                      |
| HHLA2         | HERV-H LTR-Associating 2                                                               |
| CD244         | CD244 Molecule                                                                         |
| CD274         | CD274 Molecule                                                                         |
| HAVCR2        | Hepatitis A Virus Cellular Receptor 2                                                  |
| CD27          | CD27 Molecule                                                                          |
| BTLA          | B And T Lymphocyte Associated                                                          |
| LGALS9        | Galectin 9                                                                             |
| TMIGD2        | Transmembrane and Immunoglobulin Domain Containing 2                                   |
| CD28          | CD28 Molecule                                                                          |
| CD48          | CD48 Molecule                                                                          |
| TNFRSF25      | TNF Receptor Superfamily Member 25                                                     |
| CD40LG        | CD40 Ligand                                                                            |
| ADORA2A       | Adenosine A2a Receptor                                                                 |
| VTCN1         | V-Set Domain Containing T Cell Activation Inhibitor 1                                  |
| CD160         | CD160 Molecule                                                                         |
| CD44          | CD44 Molecule                                                                          |
| TNFSF18       | TNF Superfamily Member 18                                                              |
| TNFRSF18      | TNF Receptor Superfamily Member 18                                                     |
| BTNL2         | Butyrophilin Like 2                                                                    |
| C10orf54      | V-Set Immunoregulatory Receptor                                                        |
| CD200R1       | CD200 Receptor 1                                                                       |
| TNFSF4        | TNF Superfamily Member 4                                                               |

|         |                           |
|---------|---------------------------|
| CD200   | CD244 Molecule            |
| NRP1    | Neuropilin 1              |
| TNFSF14 | TNF Superfamily Member 14 |

---

**Supplementary Table 2. Lentivirus sequence of NSUN5.**

---

| <b>Name</b> | <b>Detailed sequence</b>                                                                                                                               |
|-------------|--------------------------------------------------------------------------------------------------------------------------------------------------------|
| sh-NC       | Sense: GATCCGTTCTCCGAACGTGTCACGTAATTCAAGAGATTACGTGACACGTTCCGGAGAATTTTTTC<br>Antisense: AATTGAAAAAATTCTCCGAACGTGTCACGTAATCTTGAATTACGTGACACGTTCCGGAGAACG |
| sh-NSUN5    | Sense: GATCCGCCAAGGGAAGATCTTTGCCTTCTCGAGAAGGCAAAGATCTCCCTTGGTTTTTTG<br>Antisense: AATTCAAAAAACCAAGGGAAGATCTTTGCCTTCTCGAGAAGGCAAAGATCTCCCTTGGCG         |

---
